# Supplementary material
Source: PubMed Central journal article supplement (PMC7608740)
Supplement: tcf12_davis_et_al_suppl_material_ddaa120.pdf [file tcf12_davis_et_al_suppl_material_ddaa120.pdf]

## Supplementary Material

***TCF12* haploinsufficiency causes autosomal dominant Kallmann syndrome and reveals network-level interactions between causal loci**

Davis, Balasubramanian, et al.

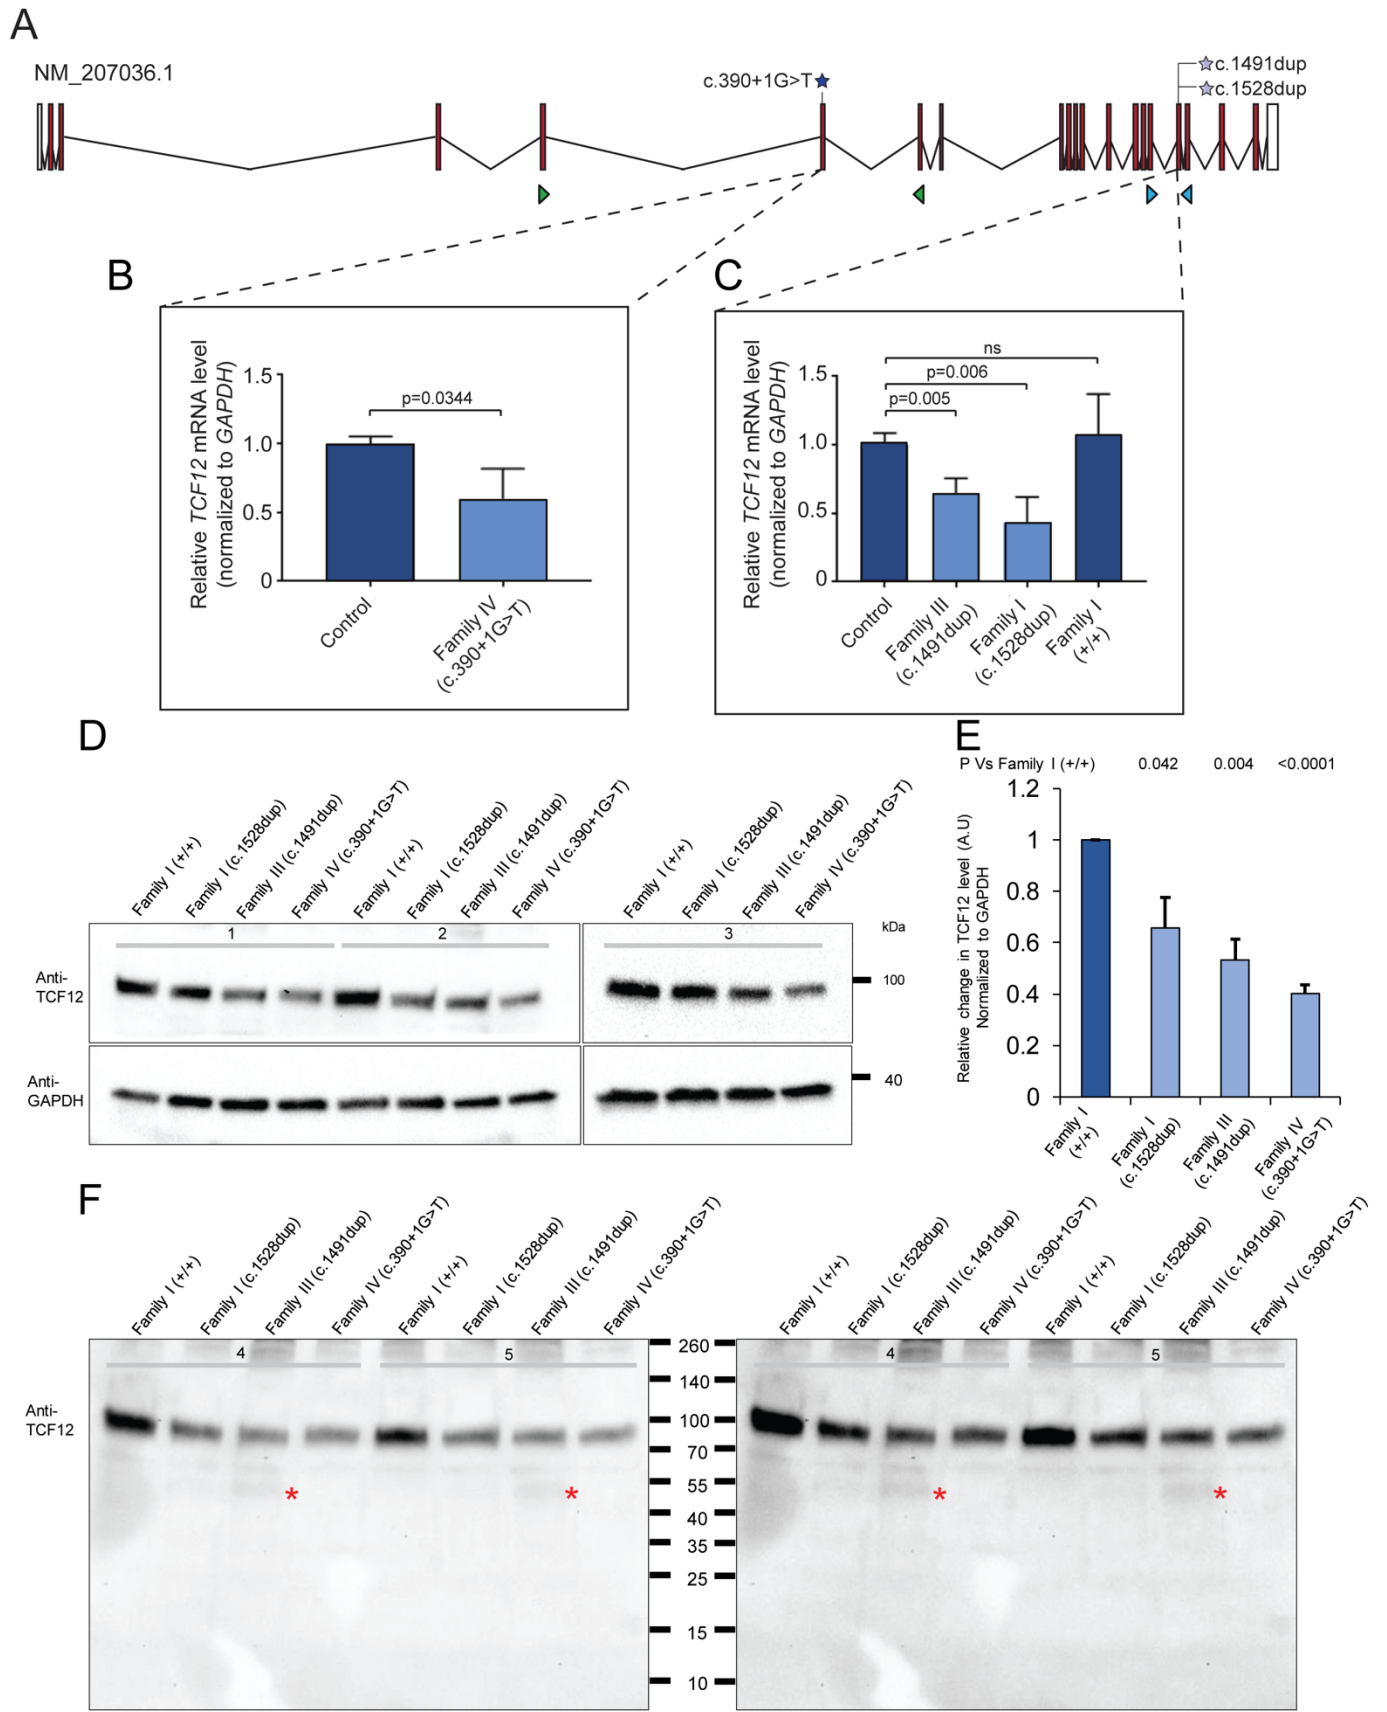

Figure S1

**Fig. S1. Individuals with *TCF12* variants have significantly reduced *TCF12* mRNA abundance. (A)**

Schematic of the human *TCF12* locus (GRCh37/hg19, chr15:57210833-57580714; GenBank ID: NM\_207036.1). White boxes, untranslated regions; red boxes, coding exons; black lines, introns; blue stars, variants identified in cases; green or blue triangles, primers used to for qPCR of regions encompassing exons 6 and 17, respectively. (B and C) qPCR data from lymphoblastoid cell lines (LCL) derived from KS cases: Patient 1 (Family I), Patient 4 (Family III) and Patient 5 (Family IV), an unaffected family member (Family I; cousin of Patient 1 and sister of Patient 2), or an unrelated matched control. *TCF12* transcript levels are significantly reduced in individuals with LOF mutations (35-65% reduction vs control), indicating degradation of mutant mRNA. ns, not significant. Error bars, standard deviation of the mean. (D) Western blot was performed on whole-cell protein extracted from LCLs derived from KS cases in three independent biological replicates. For each sample 50  $\mu$ g lysate was immunoblotted and anti-TCF12 and anti-GAPDH antibodies were used for detection, respectively. Expected molecular weight of TCF12 proteins are: WT, 73 kDa; Mutant in Family I, 55 kDa; Mutant in Family III, 54 kDa; and Mutant in Family IV, 14 kDa (assuming exon 6 exclusion, but likely would not be detectable with this TCF12 antibody). (E) Quantification of Western signal and normalization to GAPDH indicates a significant reduction in TCF12 protein abundance in samples from affected individuals compared to an unaffected individual (Family I +/+). Statistical differences were calculated using student's t-test; Error bars indicate the standard error of mean. (F) Full gel images for TCF12 immunoblot show trace amounts of putative truncated protein for Family I and Family III (red stars). Left, 250 seconds of exposure; right, 250 seconds of exposure with increased image contrast.

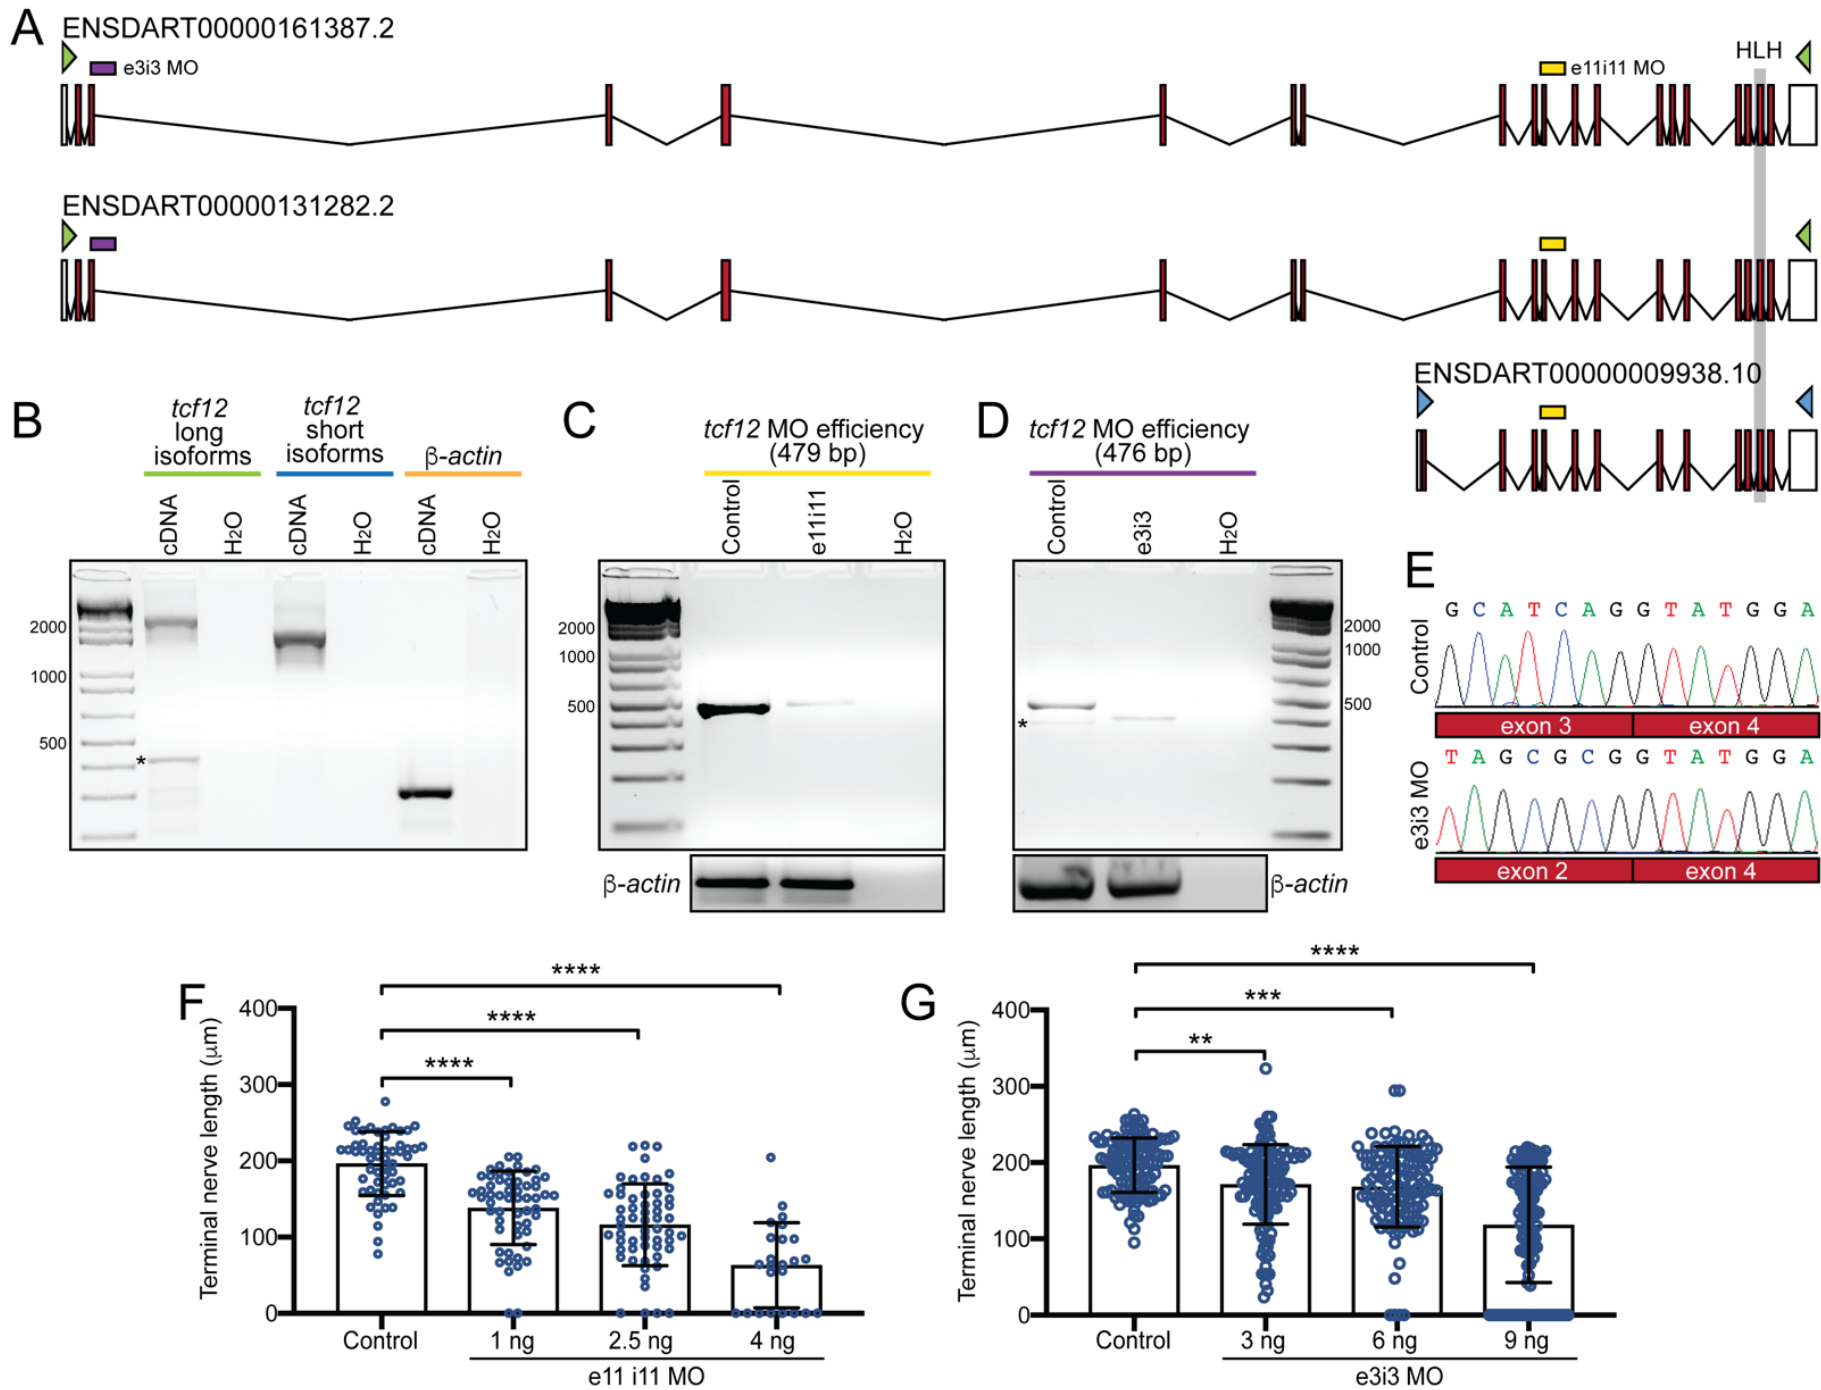

Figure S2

**Fig. S2. Characterization of *D. rerio tcf12* transcript isoforms and transient suppression reagents.** (A) Schematic of the zebrafish *tcf12* locus at chr7: 52,241,636-52,434,865 (GRCz10) depicting three different splice isoforms detected by RT-PCR in zebrafish embryos at 1 day post-fertilization (dpf). Red boxes, exons; white boxes, untranslated regions; black lines, introns. Triangles indicate primers to generate PCR products shown in panel B (green, long isoforms; blue, short isoforms, respectively). Morpholinos (MO) targeting splice donor sites are indicated with purple (e3i3) and yellow (e11i11) rectangles. Gray shaded exon indicates the sequence encoding the helix-loop-helix (HLH) domain. (B) RT-PCR products amplified from the cDNA of 1 dpf whole embryo cDNA. Colored labels correspond to primers used in panel A; amplicons were purified and sequenced and shown to correspond to Ensembl accession ID numbers shown in panel A; (\*) is a non-specific PCR product. (C and D) MO efficiency was determined by injecting 6 ng of either e11i11 (C) or e3i3 MO (D) into embryo batches, followed by RT-PCR of flanking regions on cDNA generated from 1 dpf morphant or uninjected control embryos. (\*) is a non-specific PCR product in panel D. (E) Chromatograms show that the e3i3 morphant RT-PCR product results in exclusion of exon 3 (73 bp) resulting in a frameshift and premature termination of transcripts ENSDART00000161387.2 and ENSDART00000131282.2. (F and G) Dose-dependent response of e11i11 or e3i3 MOs as indicated by measurement of terminal nerve axon length in 2 dpf embryos immunostained with anti-GnRH antibody. (\*\*\*\*),  $p < 0.0001$ ; (\*\*\*),  $p < 0.001$ ; (\*\*),  $p < 0.01$ . Statistical differences were calculated using a nonparametric Kruskal-Wallis test; error bars represent standard deviation (s.d.).

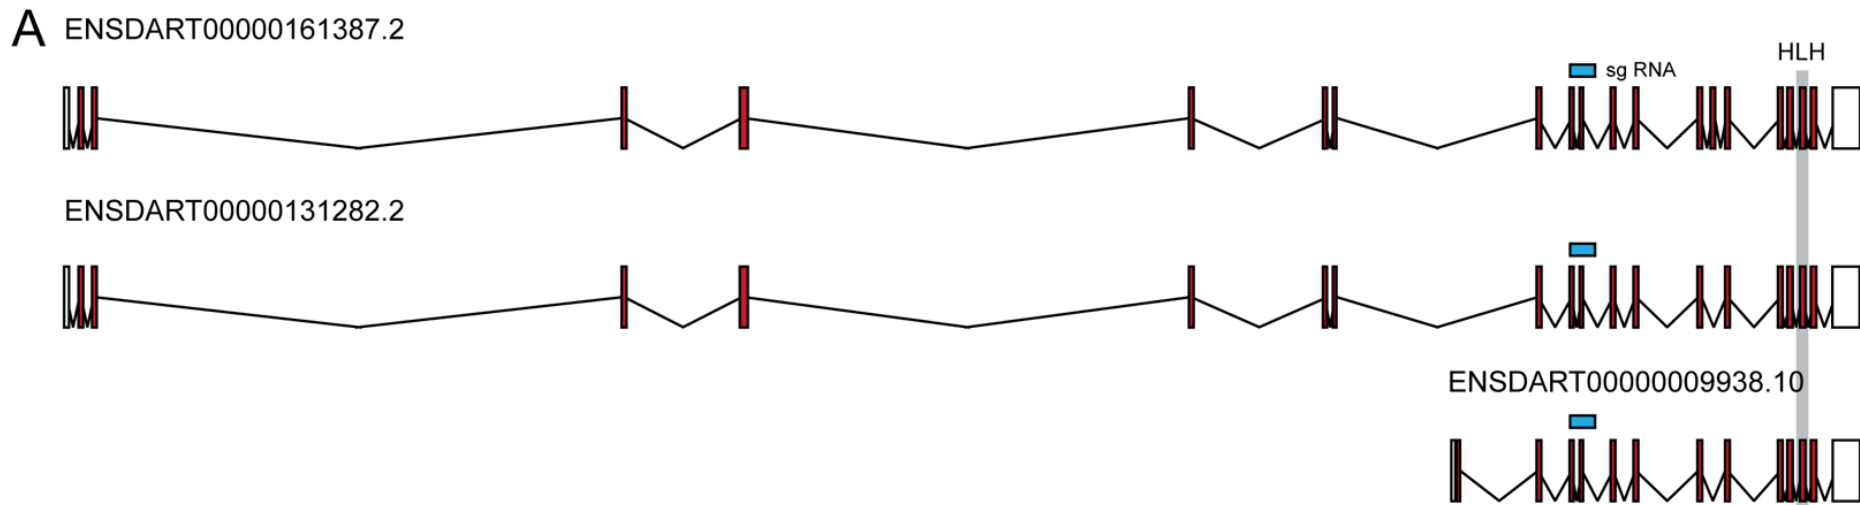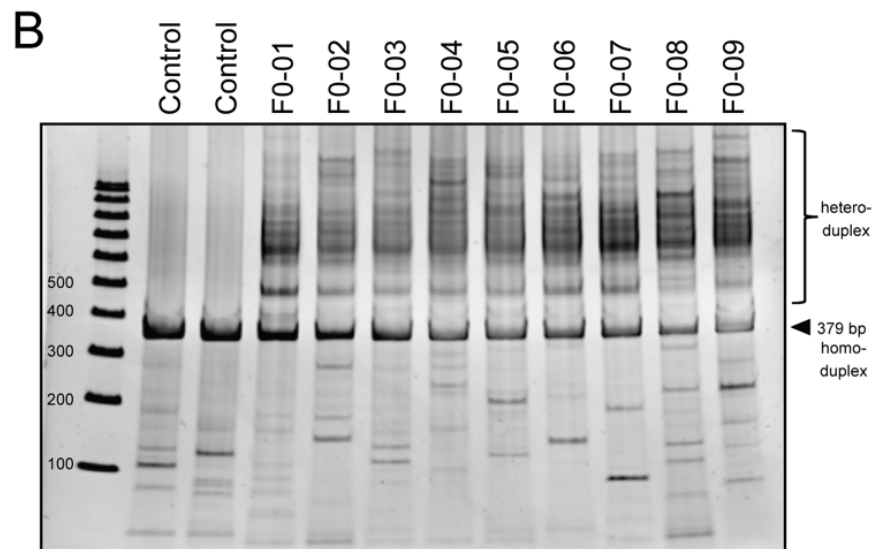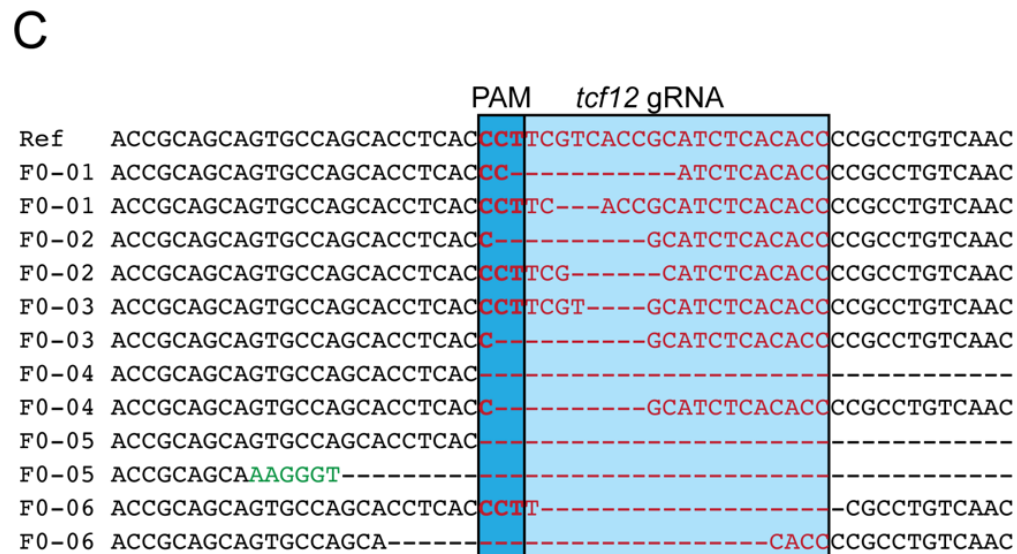

Figure S3

**Fig. S3. CRISPR/Cas9 genome-editing of the zebrafish *tcfl2* locus.** (A) Schematic of the zebrafish *tcfl2* locus at chr7: 52,241,636-52,434,865 (GRCz10) depicting three different splice isoforms detected by RT-PCR in zebrafish embryos at 1 day post-fertilization (dpf). See Fig. S2 for details. Red boxes, exons; white boxes, untranslated regions; black lines, introns. Gray shaded exon indicates the sequence encoding the helix-loop-helix (HLH) domain. Blue rectangle indicates single guide RNA (gRNA) target site on exon 11 (according to isoform ENSDART00000161387.2). (B) Heteroduplex analysis of PCR product encompassing the *tcfl2* gRNA target site indicate that all embryos injected are targeted by CRISPR/Cas9. Polyacrylamide gel is shown; uninjected controls do not display heteroduplexes, whereas heteroduplexes are present in nine different F0 embryos harvested at 2 days post-fertilization (dpf). (C) Representative sequences from cloned PCR fragments flanking the *tcfl2* gRNA target that were obtained from 6 different F0 embryos. gRNA target is indicated with red text and blue rectangle; PAM, protospacer adjacent motif; green text, insertion. 12 clones were sequenced per embryo to result in an estimated 46% mosaicism.

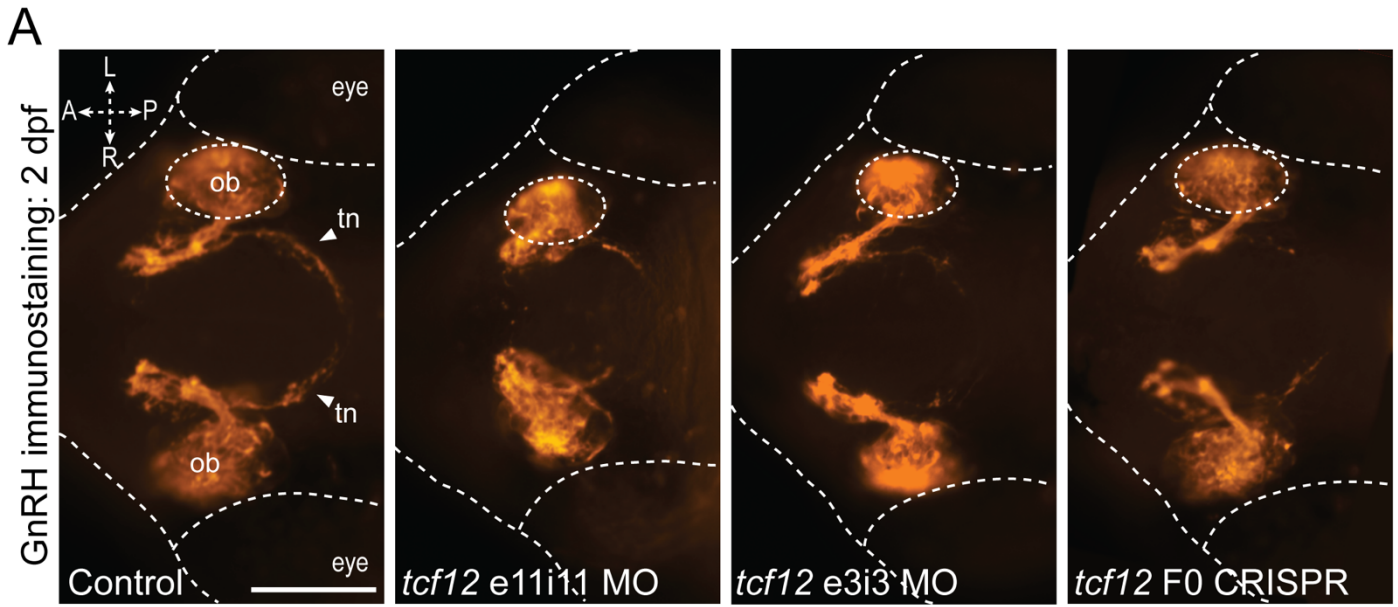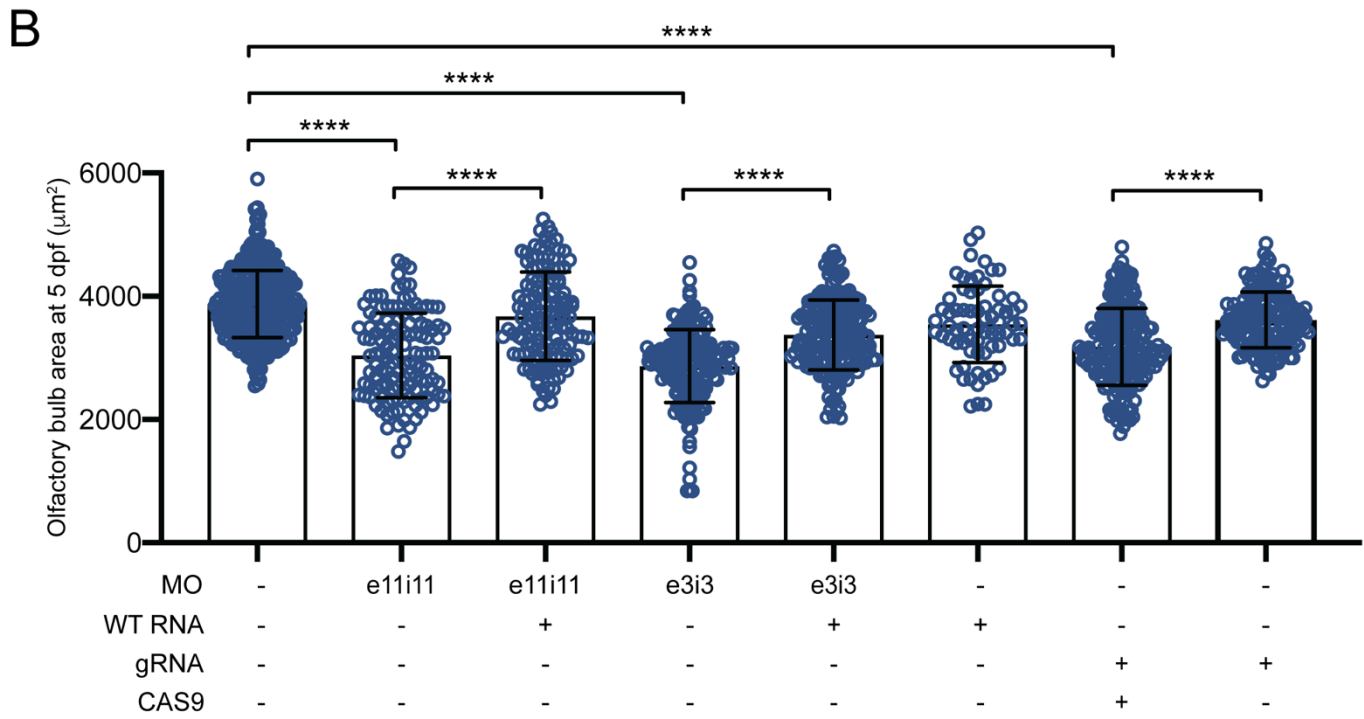

Figure S4



**Fig. S4. *Tcf12* morphants and F0 mutants display a reduction in olfactory bulb size.** (A) Representative ventral views of fluorescence immunostained (anti-GnRH antibody) *tcf12* morphants (MO) or F0 CRISPR mutant embryos at 2 days post-fertilization (dpf). Dashed ovals indicate olfactory bulb area that was measured. Abbreviations: ob, olfactory bulb; tn, terminal nerve; A, anterior; P, posterior; L, left; R, right; scale bar 100  $\mu\text{m}$ , equivalent scale across panels. (B) Measurement of olfactory bulb area in GnRH antibody stained embryos. Statistically significant differences were calculated using a nonparametric Kruskal-Wallis test; (\*\*\*\*),  $p < 0.0001$ ; error bars represent standard deviation (s.d.).  $n = 34-196$  embryos per injection batch.

A

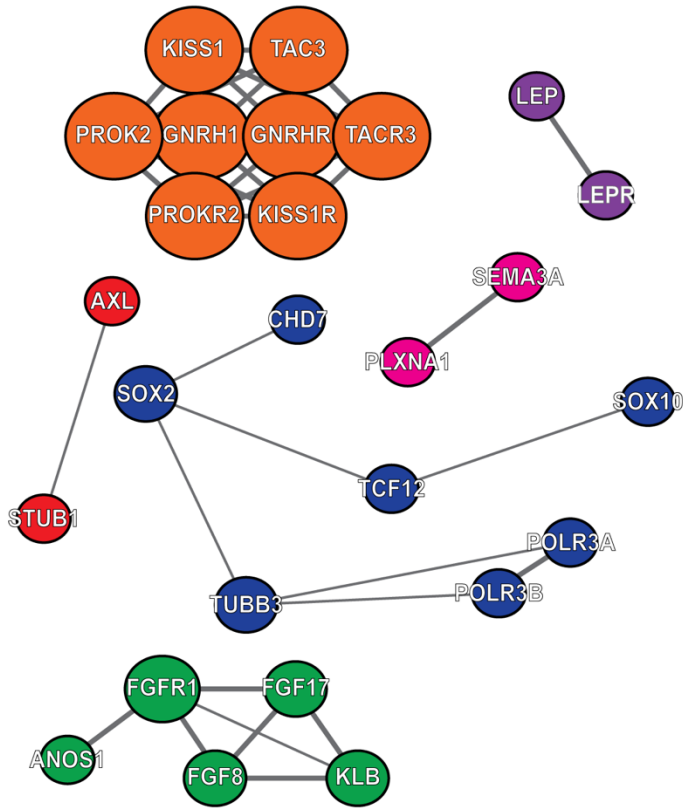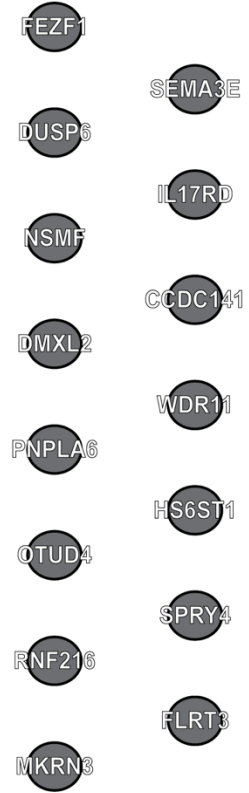

B

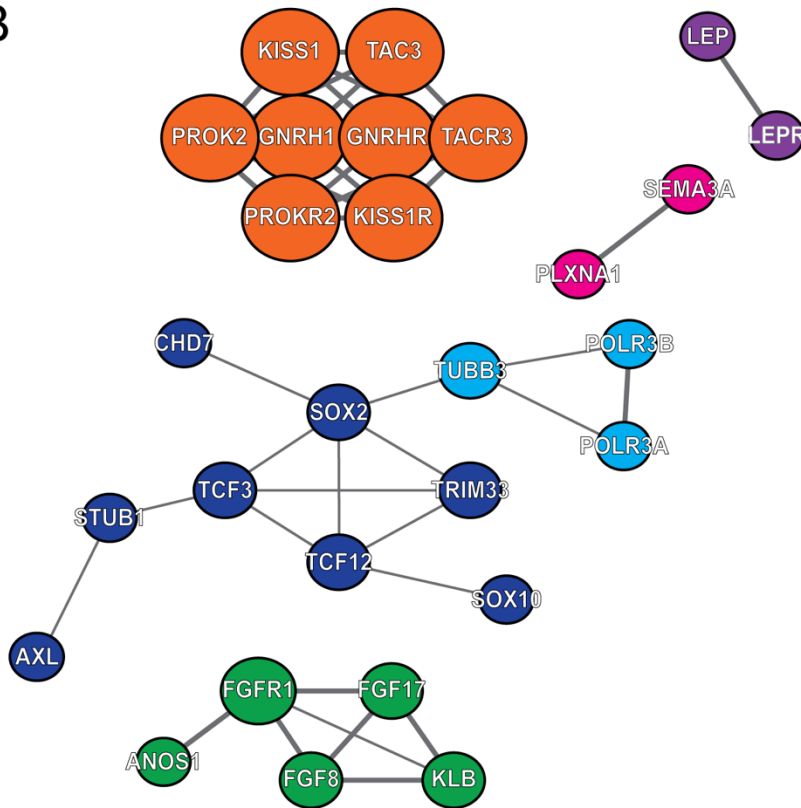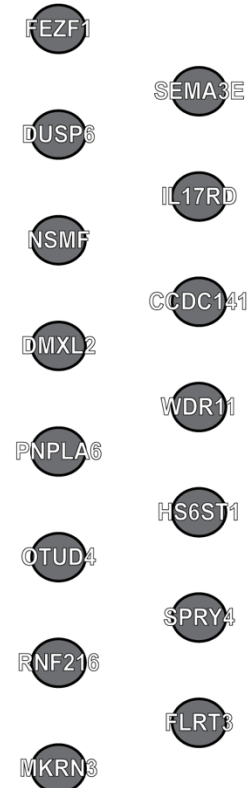

Figure S5

**Fig. S5. Schematic of the TCF12 protein-protein interaction network according to GeNets.** (A) Network generated with 40 IGD genes (Table S5). (B) Network generated with 40 IGD genes plus two TCF12 interactors identified with an integrative multi-species algorithm (TCF3 and TRIM33; see Fig. S6). Similar colored nodes indicate protein communities more likely to interact with one another than with genes in other modules. Gray circles indicate proteins that are not associated with any community.

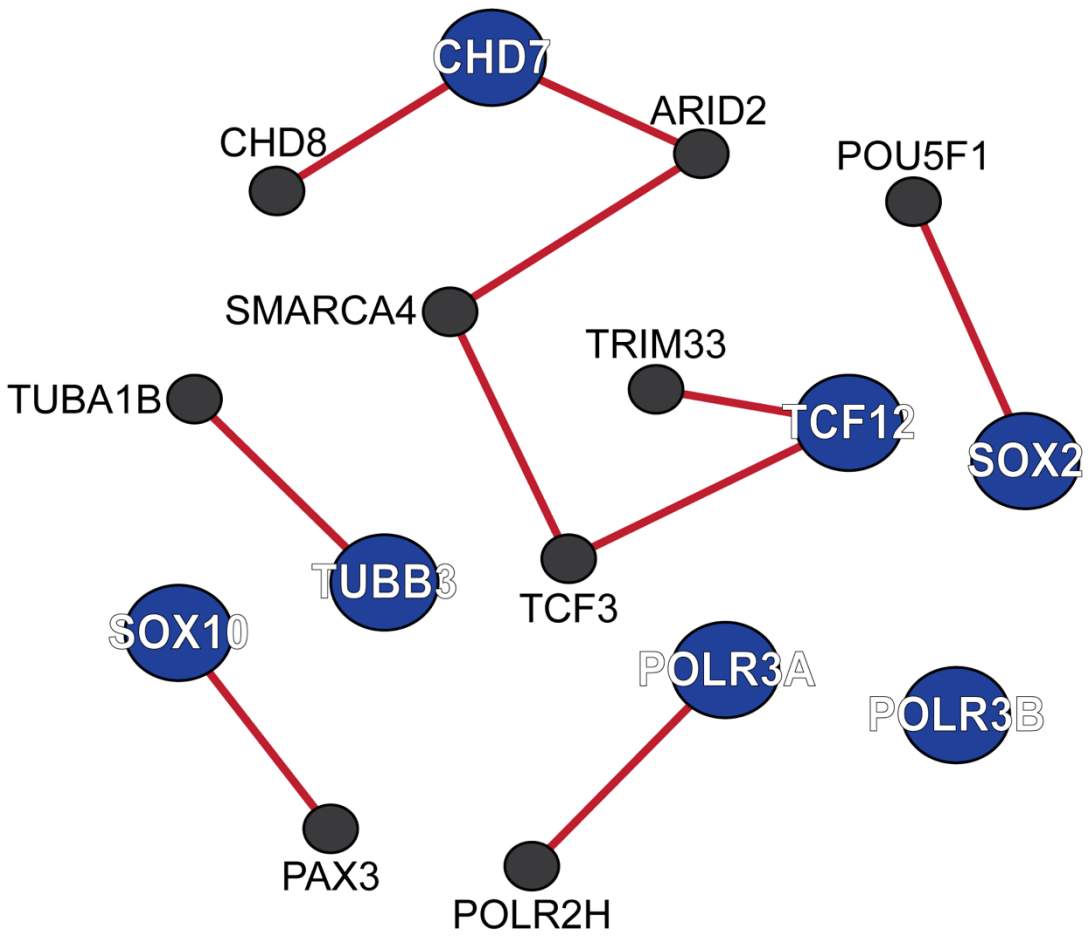

Figure S6

**Fig. S6. Expanded TCF12 affinity network predicted by an integrative multi-species prediction algorithm (IMP).** We applied predicted IGD genes in the TCF12 protein community identified by GeNets (blue circles; Fig. S5A) to IMP and identified two additional direct interactors, TCF3 and TRIM33.

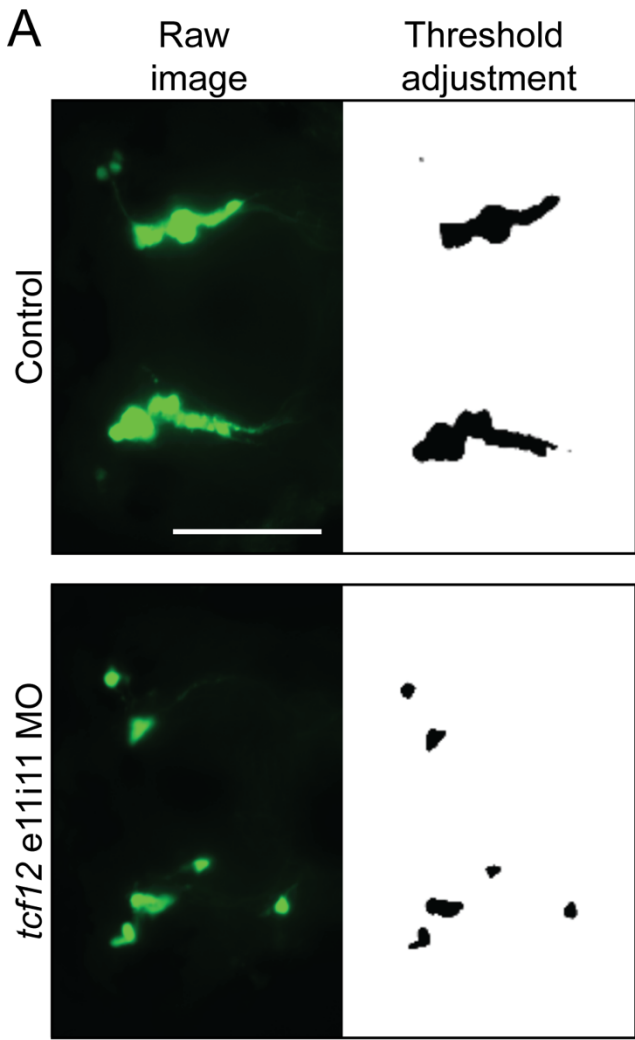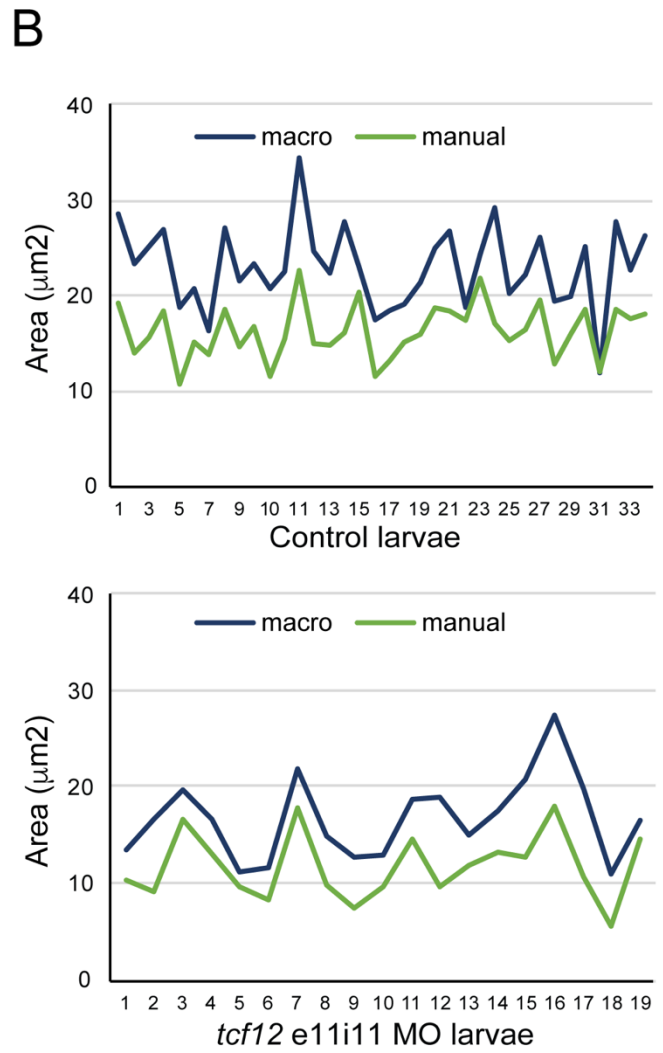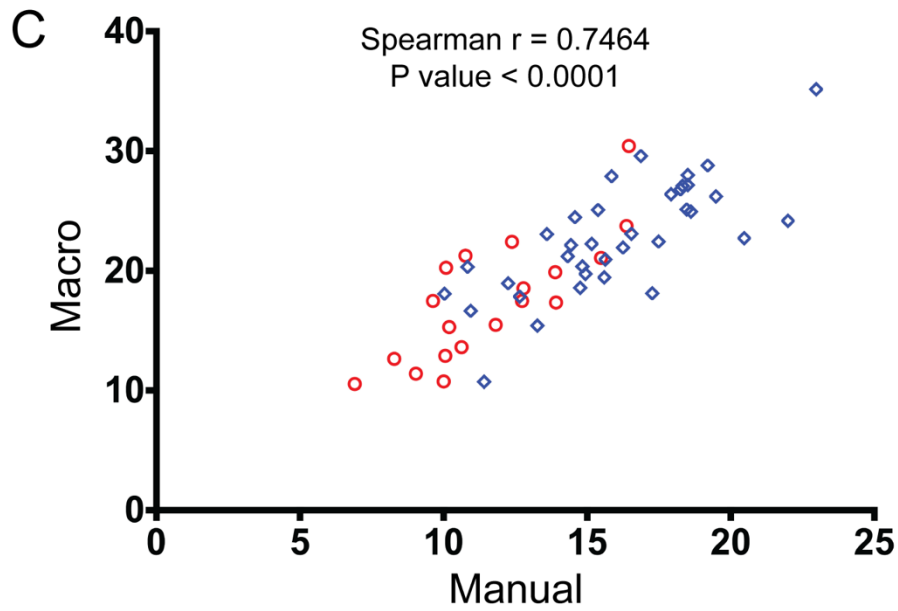

Figure S7

**Fig. S7. Development of an automated image measurement paradigm for *gnrh3:egfp* neuronal patterning.** (A) Representative dorsal images acquired from *tg(gnrh3:egfp)* larvae at 5 dpf using the VAST Bioimager. Left, raw fluorescence image; right, post-processing image with ImageJ (NIH) threshold adjustment; scale bar 100  $\mu\text{m}$ , equivalent scale across panels. (B) Comparison of manual measurement versus automated measurement using the ImageJ macro plotted for individual larvae across two different experimental conditions; n=34 control larvae and 20 control larvae. (C) Correlation between two different measurement paradigms using Spearman's rank correlation. Blue diamonds, controls; red circles, *tcfl2* morphants.

**A**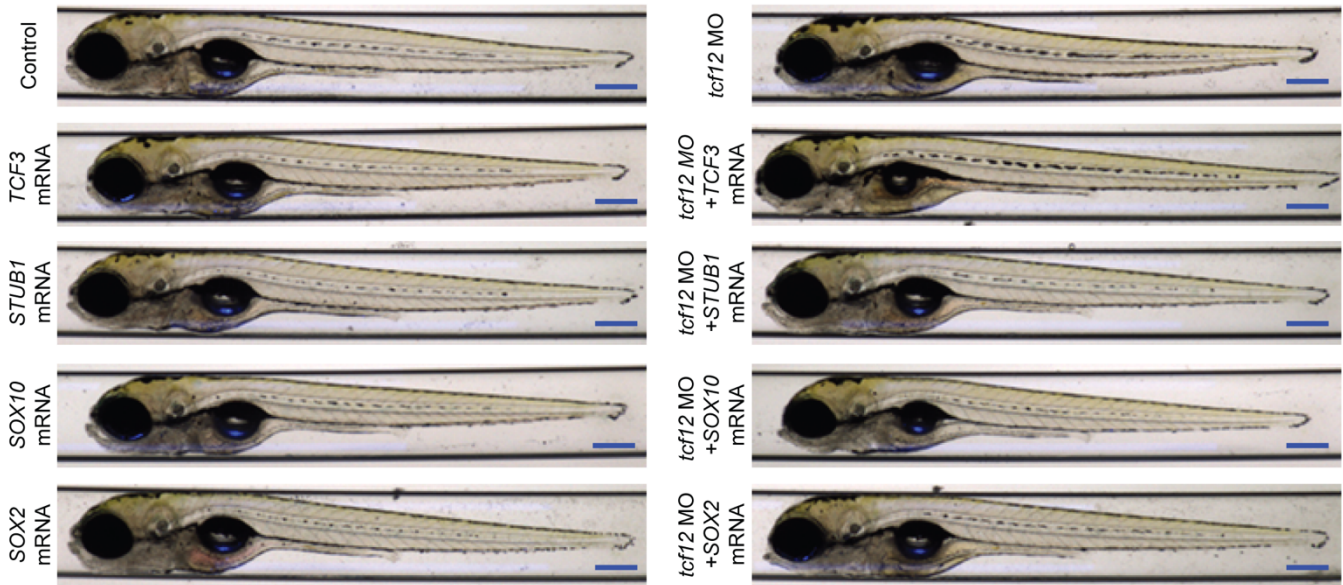**B**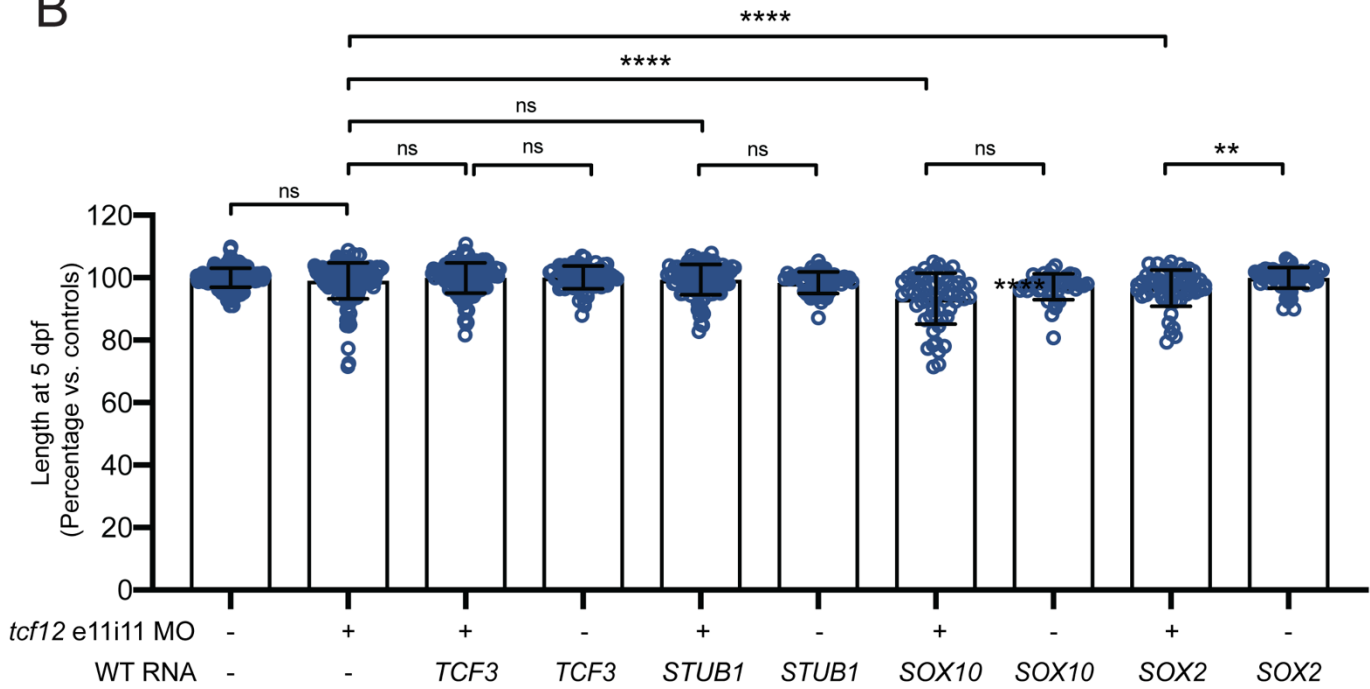

Figure S8



**Fig. S8. Zebrafish larvae assessed in TCF12 network studies display minimal overt morphological defects.** (A) Representative lateral bright field images acquired from *tg(gnrh3:egfp)* larvae at 5 dpf using the VAST Bioimager on-board camera. Scale bar 300  $\mu$ m, equivalent scale across panels. (B) Quantification of larval body length represented as a percentage versus the mean of controls for *in vivo* complementation studies of *tcf12* e11i11 MO with WT human mRNA; see Fig. 4c for *gnrh3*-GFP area measurements. We used FishInspector software to measure larval length; ns, not significant; \*\*\*\* $p < 0.0001$ ; \*\* $p < 0.01$  (nonparametric Kruskal-Wallis test); error bars represent standard deviation (s.d.). n=44-189 larvae/batch, repeated.

**Table S1. Rare sequence variants (RSV)s shared between the affected male cousins in Family I.**

| Gene           | Cytogenetic location | Protein name                                                        | UniprotKB | OMIM ID | Phenotype in OMIM | hg19 coordinate | Transcript (GenBank / ENSEMBL) | Nucleotide change | Protein change    | Frequency in controls (ExAC)  | pLI score | Missense z-score |
|----------------|----------------------|---------------------------------------------------------------------|-----------|---------|-------------------|-----------------|--------------------------------|-------------------|-------------------|-------------------------------|-----------|------------------|
| <i>SLC12A4</i> | 16q22.1              | Solute carrier family 12 (Potassium/chloride transporter), member 4 | Q9UP95    | 604119  | NA                | chr16: 67979422 | NM_005072.4                    | c.2882G>A         | p.Arg961Gln       | 0.000182 (22/120872 alleles)  | 0         | 1.81             |
| <i>SRCIN1</i>  | 17q12                | SRC kinase signaling inhibitor 1                                    | Q9C0H9    | 610786  | NA                | chr17: 36704828 | NM_025248.2                    | c.3235G>A         | p.Glu1079Lys      | 0.0005985 (72/120310 alleles) | 1.00      | 4.43             |
| <i>FOSB</i>    | 19q13.32             | V-fos FBJ murine osteosarcoma viral oncogene homolog B              | P53539    | 164772  | NA                | chr19: 45974273 | ENST00000590335.1              | c.513G>A          | p.Met171Ile       | 0                             | 0.5       | 2.81             |
| <i>MUC16</i>   | 19p13.2              | Mucin 16                                                            | Q8WXI7    | 606154  | NA                | chr19: 9064390  | NM_024690.2                    | c.23056C>T        | p.Pro7686Ser      | 0.00003351 (4/119366 alleles) | NA        | NA               |
| <i>TCF12</i>   | 15q21.3              | Transcription factor 12                                             | Q99081    | 600480  | NA                | chr15: 57554351 | NM_207036.1                    | c.1528dup         | p.Thr510Asn fs*12 | 0                             | 0.97      | 0.35             |
| <i>WIF1</i>    | 12q14.3              | WNT inhibitory factor 1                                             | Q9Y5W5    | 605186  | NA                | chr12: 65461473 | NM_007191.4                    | c.634+2T>A        | NA                | 0                             | 0         | -0.16            |

Abbreviations: NA, Not available.

**Table S2. Rare sequence variants (RSV)s identified in our KS cohort with stringent exome filtering criteria (pLI >0.09 or missense Z-score >3; absent from ExAC).**

| Gene                           | Cytogenetic location | Protein name                                            | Uniprot KB | OMIM ID | Phenotype in OMIM                                                                                                                       | hg19 coordinate | Transcript (GenBank / ENSEMBL) | Nucleotide change | Protein change   | Frequency in controls (ExAC) | pLI score | Missense z-score |
|--------------------------------|----------------------|---------------------------------------------------------|------------|---------|-----------------------------------------------------------------------------------------------------------------------------------------|-----------------|--------------------------------|-------------------|------------------|------------------------------|-----------|------------------|
| <b>Family I, Individual 1</b>  |                      |                                                         |            |         |                                                                                                                                         |                 |                                |                   |                  |                              |           |                  |
| <i>NPR2</i>                    | 19p.13.3             | Atrial natriuretic peptide receptor 2                   | P20594     | 108961  | Acromesomelic dysplasia, Maroteaux type; Epiphyseal chondrodysplasia, Miura type; Short stature with nonspecific skeletal abnormalities | chr9: 35802582  | ENST00000342694                | c.2048 T>C        | p.Tyr598Cys      | 0                            | 0.99      | 4.22             |
| <i>ZBTB20</i>                  | 3q13.31              | Zinc finger and BTB domain-containing protein 20        | Q9HC78     | 606025  | Primrose syndrome                                                                                                                       | chr3: 114099124 | ENST00000474710 *              | c.139del          | p.Ala47Profs*9   | 0                            | 0.98      | 5.72             |
| <i>MKRNI</i>                   | 7q34                 | E3 ubiquitin-protein ligase makorin-1                   | Q9UHC7     | 607754  | NA                                                                                                                                      | chr7: 140159508 | ENST00000494939                | c.351dup          | p.Thr118Aspfs*7  | 0                            | 0.98      | 1.23             |
| <i>TCF12</i>                   | 15q21.3              | Transcription factor 12                                 | Q99081     | 600480  | Craniosynostosis 3                                                                                                                      | chr15: 57554351 | NM_207036.1                    | c.1528dup         | p.Thr510Asnfs*12 | 0                            | 0.97      | 0.35             |
| <b>Family I, Individual 2</b>  |                      |                                                         |            |         |                                                                                                                                         |                 |                                |                   |                  |                              |           |                  |
| <i>TLN1</i>                    | 9p13.3               | Talin-1                                                 | Q9Y490     | 186745  | NA                                                                                                                                      | chr9: 35707068  | ENST00000314888                | c.4955+1 G>T      | Splice Variant   | 0                            | 1         | 5.13             |
| <i>TMEM57</i>                  | 1p36.11              | Macoilin                                                | Q8N5G2     | 610301  | NA                                                                                                                                      | chr1: 25812190  | ENST00000399763                | c.326G>A          | p.Arg109Gln      | 0                            | 0.99      | 3.72             |
| <i>PLEKHA6</i>                 | 1q32.1               | Pleckstrin homology domain-containing family A member 6 | Q9Y2H5     | 607771  | NA                                                                                                                                      | chr1: 204230579 | ENST00000414478 *              | c.439C>T          | p.Gln147*        | 0                            | 0.98      | -0.74            |
| <i>TCF12</i>                   | 15q21.3              | Transcription factor 12                                 | Q99081     | 600480  | Craniosynostosis 3                                                                                                                      | chr15: 57554351 | ENST00000559703                | c.1528dup         | p.Thr510Asnfs*12 | 0                            | 0.97      | 0.35             |
| <b>Family II, Individual 3</b> |                      |                                                         |            |         |                                                                                                                                         |                 |                                |                   |                  |                              |           |                  |
| <i>SEMA6B</i>                  | 19p13.3              | Semaphorin-6B                                           | Q9H3T3     | 608873  | NA                                                                                                                                      | chr19           | ENST00000586965                | c.538C>G          | p.His180Ala      | 0                            | 0.74      | 3.41             |

|                                 |          |                                                                     |            |        |                                                              |                 |                  |                |                  |   |      |      |
|---------------------------------|----------|---------------------------------------------------------------------|------------|--------|--------------------------------------------------------------|-----------------|------------------|----------------|------------------|---|------|------|
| <i>TCF12</i>                    | 15q21.3  | Transcription factor 12                                             | Q99081     | 600480 | Craniosynostosis 3                                           | chr15           | ENST00000559703  | c.1490_1491del | p.Ser497Cysfs*12 | 0 | 0.97 | 0.35 |
| <b>Family III, Individual 4</b> |          |                                                                     |            |        |                                                              |                 |                  |                |                  |   |      |      |
| <i>HERC1</i>                    | 15q22.31 | Probable E3 ubiquitin-protein ligase HERC1                          | Q15751     | 605109 | Macrocephaly, dysmorphic facies, and psychomotor retardation | chr15:63954109  | ENST00000443617  | c.9013A>G      | p.Ser3005Gly     | 0 | 1    | 3.82 |
| <i>TCF12</i>                    | 15q21.3  | Transcription factor 12                                             | Q99081     | 600480 | Craniosynostosis 3                                           | chr15:57554314  | ENST00000559703  | c.1491dup      | p.Val498Cysfs*12 | 0 | 0.97 | 0.34 |
| <b>Family IV, Individual 5</b>  |          |                                                                     |            |        |                                                              |                 |                  |                |                  |   |      |      |
| <i>PITPNM2</i>                  | 12q24.31 | Membrane-associated phosphatidylinositol transfer protein 2         | Q9BZ72     | 608920 | NA                                                           | chr12:123475208 | ENST00000542749  | c.2453C>T      | p.Pro818Leu      | 0 | 0.99 | 4.67 |
| <i>ANAPC2</i>                   | 9q34.3   | Anaphase-promoting complex subunit 2                                | Q9UJX6     | 606946 | NA                                                           | chr9:140076270  | ENST00000323927  | c.1331G>C      | p.Gly444Ala      | 0 | 0.98 | 3.51 |
| <i>MAP2K7</i>                   | 19p13.2  | Dual specificity mitogen-activated protein kinase kinase 7          | O14733     | 603014 | NA                                                           | chr19:7968949   | ENST00000545011* | c.120G>T       | p.Arg40Ser       | 0 | 0.98 | 3.55 |
| <i>TCF12</i>                    | 15q21.3  | Transcription factor 12                                             | Q99081     | 600480 | Craniosynostosis 3                                           | chr15:57458665  | ENST00000557947  | c.390+1G>T     | Splice Variant   | 0 | 0.97 | 0.34 |
| <b>Family V, Individual 6</b>   |          |                                                                     |            |        |                                                              |                 |                  |                |                  |   |      |      |
| <i>B3GAT1</i>                   | 11q25    | Galactosylgalactosylxylosylprotein 3-beta-glucuronosyltransferase 1 | Q9P2W7     | 151290 | NA                                                           | chr11:134253872 | ENST00000524765  | c.323C>T       | p.Thr108Met      | 0 | 0.79 | 3.27 |
| <i>TCF12</i>                    | 15q21.3  | Transcription factor 12                                             | Q99081     | 600480 | Craniosynostosis 3                                           | chr15:57543622  | ENST00000559703  | c.1188+1G>A    | Splice Variant   | 0 | 0.97 | 0.35 |
| <b>Family VI, Individual 7</b>  |          |                                                                     |            |        |                                                              |                 |                  |                |                  |   |      |      |
| <i>KIAA2018</i>                 | 3q13.2   | Basic helix-loop-helix domain-containing protein USF3               | A0A1W1GCQ4 | 617568 | NA                                                           | chr3:113378610  | ENST00000478658  | c.1918_1919dup | p.Pro640Hisfs*8  | 0 | 1    | -1.2 |
| <i>DDX3X</i>                    | Xp11.4   | ATP-dependent RNA helicase DDX3X                                    | O00571     | 300160 | Mental retardation, X-linked 102                             | chrX:41193929   | ENST00000542215* | c.84G>T        | p.Trp28Cys       | 0 | 1    | 5.13 |

|                                  |         |                                                   |        |        |                                                                                                                                                                                                                         |                    |                 |                |                  |   |      |      |
|----------------------------------|---------|---------------------------------------------------|--------|--------|-------------------------------------------------------------------------------------------------------------------------------------------------------------------------------------------------------------------------|--------------------|-----------------|----------------|------------------|---|------|------|
| <i>CHMP7</i>                     | 8p21.3  | Charged multivesicular body protein 7             | Q8WUX9 | 611130 | NA                                                                                                                                                                                                                      | chr8:<br>23112839  | ENST00000397677 | c.551del       | p.Ser184Thrfs*38 | 0 | 0.98 | 2.22 |
| <i>REPS2</i>                     | Xp22.2  | RalBP1-associated Eps domain-containing protein 2 | Q8NFH8 | 300317 | NA                                                                                                                                                                                                                      | chrX:<br>16965152  | ENST00000357277 | c.168_169dup   | p.Glu59Argfs*19  | 0 | 0.97 | 1.23 |
| <i>TCF12</i>                     | 15q21.3 | Transcription factor 12                           | Q99081 | 600480 | Craniosynostosis 3                                                                                                                                                                                                      | chr15:<br>57545652 | ENST00000559703 | c.1453C>T      | p.Arg485*        | 0 | 0.97 | 0.35 |
| <b>Family VII, Individual 8</b>  |         |                                                   |        |        |                                                                                                                                                                                                                         |                    |                 |                |                  |   |      |      |
| <i>DSCAM</i>                     | 21q22.2 | DS Cell Adhesion Molecule                         | O60469 | 602523 | NA                                                                                                                                                                                                                      | chr21:<br>41416097 | ENST00000400454 | c.5291T>C      | p.Leu1764Pro     | 0 | 1    | 4.35 |
| <i>TCF12</i>                     | 15q21.3 | Transcription factor 12                           | Q99081 | 600480 | Craniosynostosis 3                                                                                                                                                                                                      | chr15:<br>57545467 | ENST00000559703 | c.1270dup      | p.Met424Asnfs*10 | 0 | 0.97 | 0.35 |
| <b>Family VIII, Individual 9</b> |         |                                                   |        |        |                                                                                                                                                                                                                         |                    |                 |                |                  |   |      |      |
| <i>ACAN</i>                      | 15q26.1 | Aggrecan core protein                             | P16112 | 155760 | ?Spondyloepimetaphyseal dysplasia, aggrecan type;<br>?Spondyloepiphyseal dysplasia, Kimberley type;<br>Short stature and advanced bone age, with or without early-onset osteoarthritis and/or osteochondritis dissecans | chr15:<br>89388814 | ENST00000559004 | c.1130G>A      | p.Trp377*        | 0 | 1    | 1.03 |
| <i>CNTN1</i>                     | 12q12   | Contactin-1                                       | Q12860 | 600016 | ?Myopathy, congenital, Compton-North                                                                                                                                                                                    | chr12:<br>41422964 | ENST00000551295 | c.2923G>T      | p.Glu975*        | 0 | 1    | 1.25 |
| <i>TCF12</i>                     | 15q21.3 | Transcription factor 12                           | Q99081 | 600480 | Craniosynostosis 3                                                                                                                                                                                                      | chr15:<br>57543567 | ENST00000559703 | c.1136dup      | p.Gly380Trpfs*11 | 0 | 0.97 | 0.35 |
| <b>Family IX, Individual 10</b>  |         |                                                   |        |        |                                                                                                                                                                                                                         |                    |                 |                |                  |   |      |      |
| <i>INTS3</i>                     | 1q21.3  | Integrator complex subunit 3                      | Q68E01 | 611347 | NA                                                                                                                                                                                                                      | chr1:<br>153744392 | ENST00000435409 | c.2673_2674dup | p.Ser893Valfs*20 | 0 | 1    | 5.19 |
| <i>JARID2</i>                    | 6p22.3  | Protein Jumonji                                   | Q92833 | 601594 | NA                                                                                                                                                                                                                      | chr6:<br>15487747  | ENST00000397311 | c.364C>T       | p.Arg122Trp      | 0 | 1    | 3.7  |

|                                   |             |                                                               |        |        |                                           |                    |                 |                |                   |   |      |       |
|-----------------------------------|-------------|---------------------------------------------------------------|--------|--------|-------------------------------------------|--------------------|-----------------|----------------|-------------------|---|------|-------|
| <i>KCNQ5</i>                      | 6q13        | Potassium voltage-gated channel subfamily KQT member 5        | Q9NR82 | 607357 | Mental retardation, autosomal dominant 46 | chr6:<br>73332001  | ENST00000370392 | c.84_85dup     | p.Arg31Alafs*69   | 0 | 1    | 4.62  |
| <i>PLXNB1</i>                     | 3p21.31     | Plexin-B1                                                     | O43157 | 601053 | NA                                        | chr3:<br>48453998  | ENST00000358536 | c.4885_4886dup | p.Phe1629Serfs*22 | 0 | 0.85 | 3.07  |
| <i>TCF12</i>                      | 15q21.3     | Transcription factor 12                                       | Q99081 | 600480 | Craniosynostosis 3                        | chr15:<br>57535737 | ENST00000537840 | c.1103C>G      | p.Ser368*         | 0 | 0.97 | 0.35  |
| <b>Family X, Individual 11</b>    |             |                                                               |        |        |                                           |                    |                 |                |                   |   |      |       |
| <i>SLC30A10</i>                   | 1q41        | Zinc transporter 10                                           | Q6XR72 | 611146 | Hypermanganesemia with dystonia 1         | chr1:220101381     | ENST00000366926 | c.401del       | p.Phe134Serfs*58  | 0 | 0.97 | -0.56 |
| <i>PRR23D1</i>                    | 8p23.1      | Proline-rich protein 23D1                                     | E9PI22 | NA     | NA                                        | chr8:7399259       | ENST00000533250 | c.697A>G       | p.Ser233Gly       | 0 | 0.42 | 3.22  |
| <i>TCF12</i>                      | 15q21.3     | Transcription factor 12                                       | Q99081 | 600480 | Craniosynostosis 3                        | chr15:57524615     | ENST00000537840 | c.812C>G       | p.Ser271*         | 0 | 0.97 | 0.35  |
| <b>Family XI, Individual 12</b>   |             |                                                               |        |        |                                           |                    |                 |                |                   |   |      |       |
| <i>KALRN</i>                      | 3q21.1-21.2 | Kalirin RhoGEF kinase                                         | O60229 | 604605 | NA                                        | chr3:<br>124180798 | ENST00000240874 | c.3910T>G      | p.Leu1304Val      | 0 | 1    | 4.67  |
| <i>TENM2</i>                      | 5q34        | Teneurin transmembrane protein 2                              | Q9NT68 | 610119 | NA                                        | chr5:<br>167419969 | ENST00000403607 | c.968C>A       | p.Ser323Tyr       | 0 | 1    | 3.4   |
| <i>TCF12</i>                      | 15q21.3     | Transcription factor 12                                       | Q99081 | 600480 | Craniosynostosis 3                        | chr15:<br>57525003 | ENST00000537840 | c.920dup       | p.Tyr301*         | 0 | 0.97 | 0.35  |
| <i>ZNF236</i>                     | 18q23       | Zinc finger protein 236                                       | Q9UL36 | 604760 | NA                                        | chr18:<br>74625740 | ENST00000253159 | c.2941C>T      | p.His981Tyr       | 0 | 1    | 4.89  |
| <i>KCNGB1</i>                     | 20q13.13    | Potassium voltage-gated channel modifier subfamily G member 1 | Q9UIX4 | 603788 | NA                                        | chr20:<br>49626733 | ENST00000371571 | c.143C>T       | p.Pro48Leu        | 0 | 0.27 | 5.81  |
| <i>PC</i>                         | 11q13.2     | Pyruvate carboxylase                                          | P11498 | 608786 | Pyruvate Carboxylase Deficiency           | chr11:<br>66639539 | ENST00000393960 | c.92G>T        | p.Arg31Leu        | 0 | 0.72 | 4.05  |
| <b>Family XIII, Individual 14</b> |             |                                                               |        |        |                                           |                    |                 |                |                   |   |      |       |
| <i>CUL9</i>                       | 6p21.1      | Cullin-9                                                      | Q8IWT3 | 607489 | NA                                        | chr6:<br>43191839  | NM_015089.4     | c.7291C>G      | p.Arg2431Gly      | 0 | 0.97 | 2.9   |

|                |          |                                                           |        |        |                                                                              |                    |                       |               |                      |   |      |      |
|----------------|----------|-----------------------------------------------------------|--------|--------|------------------------------------------------------------------------------|--------------------|-----------------------|---------------|----------------------|---|------|------|
| <i>DNMI</i>    | 9q34.11  | Dynamin-1                                                 | Q05193 | 602377 | Epileptic encephalopathy, early infantile, 31, Autosomal dominant            | chr9:<br>130982483 | ENST00000372923.<br>3 | c.712A>G      | p.Ser238Gly          | 0 | 1    | 5.97 |
| <i>CACNA1C</i> | 12p13.33 | Voltage-dependent L-type calcium channel subunit alpha-1C | Q13936 | 114205 | Timothy syndrome, Autosomal dominant; Long QT syndrome 8; Brugada syndrome 3 | chr12:<br>2800073  | NM_199460.3           | c.6374T><br>C | p.Ile2125Thr         | 0 | 1    | 6.41 |
| <i>ZFHX2</i>   | 14q11.2  | Zinc finger homeobox protein 2                            | Q9C0A1 | 617828 | Marsili syndrome                                                             | chr14:<br>24000703 | NM_033400.3           | c.2787G><br>T | p.Gln929His          | 0 | 1    | 2.95 |
| <i>TCF12**</i> | 15q21.3  | Transcription factor 12                                   | Q99081 | 600480 | Craniosynostosis 3                                                           | chr15:<br>57484409 | NM_207036.2           | c.445del      | p.Ser149Gln<br>fs*96 | 0 | 0.97 | 0.35 |

Abbreviations: NA, Not available. \*Variant impacts a non-canonical transcript. \*\*In homozygosity

**Table S3. Loss of function *TCF12* variants identified in the KS cohort.**

| Family | Individual | hg19 coordinates        | Gene         | Ref allele | Alt allele | Nucleotide change | Protein change   | Exon | Zygoty |
|--------|------------|-------------------------|--------------|------------|------------|-------------------|------------------|------|--------|
| I      | 1 and 2    | chr15:57554351-57554351 | <i>TCF12</i> | T          | TA         | c.1528dup         | p.Thr510Asnfs*12 | 17   | het    |
| II     | 3          | chr15:57554313-57554314 | <i>TCF12</i> | ACT        | A          | c.1490_1491del    | p.Ser497Cysfs*12 | 17   | het    |
| III    | 4          | chr15:57554314-57554314 | <i>TCF12</i> | C          | CT         | c.1491dup         | p.Val498Cysfs*12 | 17   | het    |
| IV     | 5          | chr15:57458665-57458665 | <i>TCF12</i> | G          | T          | c.390+1G>T        | NA               | 6    | het    |
| V      | 6          | chr15:57543622-57543622 | <i>TCF12</i> | G          | A          | c.1188+1G>A       | NA               | 14   | het    |
| VI     | 7          | chr15:57545652-57545652 | <i>TCF12</i> | C          | T          | c.1453C>T         | p.Arg485*        | 16   | het    |
| VII    | 8          | chr15:57545469-57545469 | <i>TCF12</i> | A          | AA         | c.1270dup         | p.Met424Asnfs*10 | 16   | het    |
| VIII   | 9          | chr15:57543569-57543569 | <i>TCF12</i> | C          | CC         | c.1136dup         | p.Gly380Trpfs*11 | 14   | het    |
| IX     | 10         | chr15:57535737-57535737 | <i>TCF12</i> | C          | G          | c.1103C>G         | p.Ser368*        | 13   | het    |
| X      | 11         | chr15:57524615-57524615 | <i>TCF12</i> | C          | G          | c.812C>G          | p.Ser271*        | 10   | het    |
| XI     | 12         | chr15:57525003-57525003 | <i>TCF12</i> | A          | AA         | c.920dup          | p.Tyr307*        | 11   | het    |
| XII    | 13         | chr15:57523366-57523366 | <i>TCF12</i> | C          | CC         | c.596dup          | p.Asn200Lysfs*4  | 9    | het    |
| XIII   | 14         | chr15:57484409-57484409 | <i>TCF12</i> | TT         | T          | c.445del          | p.Ser149Glnfs*96 | 7    | hom    |

Abbreviations: Ref, reference; Alt, alternate; het, heterozygous; hom, homozygous; NA, not available. Variants are named according to GenBank ID: NM\_207036.2.



**Table S4. Representative zebrafish morphometric data**

| Injection                                                                                                   | Measurement |        |        | p-value    |         |                |
|-------------------------------------------------------------------------------------------------------------|-------------|--------|--------|------------|---------|----------------|
|                                                                                                             | n           | Mean   | S.E.M. | vs Control | vs. MO  | vs. gRNA alone |
| <b>GnRH terminal nerve axon length at 2 dpf (<math>\mu\text{m}</math>; 2 measurements/embryo): Fig. 3C</b>  |             |        |        |            |         |                |
| Controls                                                                                                    | 215         | 196.00 | 2.07   | -          | -       | -              |
| 2 ng <i>tcfl2</i> e11i11 MO                                                                                 | 79          | 132.96 | 5.45   | <0.0001    | -       | -              |
| 2 ng <i>tcfl2</i> e11i11 MO + 12.5 pg WT <i>TCF12</i> RNA                                                   | 79          | 174.41 | 3.81   | 0.0020     | <0.0001 | -              |
| 6 ng <i>tcfl2</i> e3i3 MO                                                                                   | 93          | 159.43 | 5.14   | <0.0001    | -       | -              |
| 6 ng <i>tcfl2</i> e3i3 MO + 12.5 pg WT <i>TCF12</i> RNA                                                     | 94          | 182.13 | 3.69   | 0.1246     | 0.0157  | -              |
| 12.5pg WT <i>TCF12</i> RNA                                                                                  | 58          | 191.68 | 4.32   | >0.999     | -       | -              |
| 100 pg <i>tcfl2</i> gRNA + 200 pg Cas9                                                                      | 98          | 162.59 | 4.23   | <0.0001    | -       | <0.0001        |
| 100 pg <i>tcfl2</i> gRNA                                                                                    | 82          | 195.12 | 3.37   | >0.999     | -       | -              |
| <b>Area of GFP+ neurons in <i>gnrh3:gfp</i> larvae at 5 dpf (<math>\mu\text{m}^2</math>): Fig. 3D</b>       |             |        |        |            |         |                |
| Controls                                                                                                    | 125         | 23.09  | 0.88   | -          | -       | -              |
| 2 ng <i>tcfl2</i> e11i11 MO                                                                                 | 56          | 17.93  | 1.20   | <0.0001    | -       | -              |
| 2 ng <i>tcfl2</i> e11i11 MO + 12.5 pg WT <i>TCF12</i> RNA                                                   | 56          | 23.09  | 1.06   | >0.999     | <0.0001 | -              |
| 6 ng <i>tcfl2</i> e3i3 MO                                                                                   | 84          | 17.34  | 0.71   | <0.0001    | -       | -              |
| 6 ng <i>tcfl2</i> e3i3 MO + 12.5 pg WT <i>TCF12</i> RNA                                                     | 81          | 19.97  | 0.70   | >0.999     | 0.0380  | -              |
| 12.5pg WT <i>TCF12</i> RNA                                                                                  | 40          | 23.09  | 1.07   | >0.999     | -       | -              |
| 100 pg <i>tcfl2</i> gRNA + 200 pg Cas9                                                                      | 66          | 18.76  | 0.55   | 0.049      | -       | 0.017          |
| 100 pg <i>tcfl2</i> gRNA                                                                                    | 67          | 22.65  | 0.70   | >0.999     | -       | -              |
| <b>Area of GFP+ neurons in <i>gnrh3:gfp</i> larvae at 5 dpf (<math>\mu\text{m}^2</math>): Fig. 4C</b>       |             |        |        |            |         |                |
| Controls                                                                                                    | 224         | 23.09  | 0.42   | -          | -       | -              |
| 2 ng <i>tcfl2</i> e11i11 MO                                                                                 | 170         | 13.98  | 0.72   | <0.0001    | -       | -              |
| 2 ng <i>tcfl2</i> e11i11 MO + 12.5 pg WT <i>TCF3</i> RNA                                                    | 71          | 15.31  | 0.78   | <0.0001    | >0.9999 | -              |
| 12.5pg WT <i>TCF3</i> RNA                                                                                   | 43          | 19.26  | 1.04   | 0.0107     | -       | -              |
| 2 ng <i>tcfl2</i> e11i11 MO + 12.5 pg WT <i>STUB1</i> RNA                                                   | 78          | 19.68  | 0.9    | 0.0050     | <0.0001 | -              |
| 12.5pg WT <i>STUB1</i> RNA                                                                                  | 72          | 18.62  | 0.66   | <0.0001    | -       | -              |
| 2 ng <i>tcfl2</i> e11i11 MO + 12.5 pg WT <i>SOX10</i> RNA                                                   | 57          | 16.58  | 1.09   | <0.0001    | 0.3376  | -              |
| 12.5pg WT <i>SOX10</i> RNA                                                                                  | 45          | 19.69  | 0.9    | 0.0387     | -       | -              |
| 2 ng <i>tcfl2</i> e11i11 MO + 12.5 pg WT <i>SOX2</i> RNA                                                    | 58          | 15.25  | 1.11   | <0.0001    | >0.9999 | -              |
| 12.5pg WT <i>SOX2</i> RNA                                                                                   | 44          | 19.89  | 1.12   | 0.0347     | -       | -              |
| <b>GnRH terminal nerve axon length at 2 dpf (<math>\mu\text{m}</math>; 2 measurements/embryo): Fig. S2F</b> |             |        |        |            |         |                |
| Controls                                                                                                    | 68          | 196.44 | 4.41   | -          | -       | -              |
| 1 ng <i>tcfl2</i> e11i11 MO                                                                                 | 28          | 138.22 | 6.44   | <0.0001    | -       | -              |
| 2.5 ng <i>tcfl2</i> e11i11 MO                                                                               | 29          | 116.23 | 7.03   | <0.0001    | -       | -              |
| 4 ng <i>tcfl2</i> e11i11 MO                                                                                 | 24          | 63.00  | 11.40  | <0.0001    | -       | -              |
| 3 ng <i>tcfl2</i> e3i3 MO                                                                                   | 60          | 171.40 | 4.76   | 0.0006     | -       | -              |
| 6 ng <i>tcfl2</i> e3i3 MO                                                                                   | 59          | 168.35 | 4.89   | <0.0001    | -       | -              |
| 9 ng <i>tcfl2</i> e3i3 MO                                                                                   | 57          | 127.12 | 11.22  | <0.0001    | -       | -              |
| <b>Olfactory bulb area at 2 dpf (<math>\mu\text{m}^2</math>; 2 measurements/embryo): Fig. S4B</b>           |             |        |        |            |         |                |
| Controls                                                                                                    | 196         | 3875.1 | 25.57  | -          | -       | -              |
| 2 ng <i>tcfl2</i> e11i11 MO                                                                                 | 62          | 3039.6 | 61.79  | <0.0001    | -       | -              |
| 2 ng <i>tcfl2</i> e11i11 MO + 12.5 pg WT <i>TCF12</i> RNA                                                   | 69          | 3676.8 | 61.44  | 0.0038     | <0.0001 | -              |
| 6 ng <i>tcfl2</i> e3i3 MO                                                                                   | 93          | 2867.9 | 43.35  | <0.0001    | -       | -              |
| 6 ng <i>tcfl2</i> e3i3 MO + 12.5 pg WT <i>TCF12</i> RNA                                                     | 94          | 3372.4 | 41.43  | <0.0001    | <0.0001 | -              |

|                                                                 |     |        |       |         |            |         |
|-----------------------------------------------------------------|-----|--------|-------|---------|------------|---------|
| 12.5pg WT <i>TCF12</i> RNA                                      | 34  | 3544.1 | 75.14 | 0.0014  | -          | -       |
| 100 pg <i>tcfl2</i> gRNA + 200 pg Cas9                          | 98  | 3179.0 | 44.50 | <0.0001 | -          | <0.0001 |
| 100 pg <i>tcfl2</i> gRNA                                        | 82  | 3615.2 | 35.29 | 0.0007  | -          | -       |
| <b>Larval length at 5 dpf (percentage vs control): Fig. S7B</b> |     |        |       |         |            |         |
| Controls                                                        | 189 | 100    | 1.55  | -       | -          | -       |
| 2 ng <i>tcfl2</i> e11i11 MO                                     | 164 | 99.01  | 3.15  | >0.9999 | -          | -       |
| 2 ng <i>tcfl2</i> e11i11 MO + 12.5 pg WT <i>TCF3</i> RNA        | 137 | 99.91  | 2.93  | >0.9999 | >0.9999    | -       |
| 12.5pg WT <i>TCF3</i> RNA                                       | 69  | 100.07 | 3.09  | >0.9999 | -          | -       |
| 2 ng <i>tcfl2</i> e11i11 MO + 12.5 pg WT <i>STUB1</i> RNA       | 110 | 99.39  | 3.28  | >0.9999 | >0.9999    | -       |
| 12.5pg WT <i>STUB1</i> RNA                                      | 54  | 98.37  | 3.31  | 0.1323  | -          | -       |
| 2 ng <i>tcfl2</i> e11i11 MO + 12.5 pg WT <i>SOX10</i> RNA       | 59  | 93.28  | 7.47  | <0.0001 | <0.0001    | -       |
| 12.5pg WT <i>SOX10</i> RNA                                      | 61  | 97.12  | 3.77  | 0.0017  | -          | -       |
| 2 ng <i>tcfl2</i> e11i11 MO + 12.5 pg WT <i>SOX2</i> RNA        | 55  | 96.64  | 5.51  | 0.0012  | 0.0043189) | -       |
| 12.5pg WT <i>SOX2</i> RNA                                       | 40  | 99.96  | 3.65  | >0.9999 | -          | -       |

**Table S5. Established IGD genes used in the GeNets analysis**

| Gene           | Cytogenetic location | Protein name                                                            | UniprotKB | OMIM ID | Phenotype in OMIM                                                                                                                                                                                         |
|----------------|----------------------|-------------------------------------------------------------------------|-----------|---------|-----------------------------------------------------------------------------------------------------------------------------------------------------------------------------------------------------------|
| <i>AXL</i>     | 19q13.2              | AXL RECEPTOR TYROSINE KINASE                                            | P30530    | 109135  | N/A                                                                                                                                                                                                       |
| <i>CCDC141</i> | 2q31.2               | COILED-COIL DOMAIN CONTAINING 141                                       | Q6ZP82    | 616031  | N/A                                                                                                                                                                                                       |
| <i>CHD7</i>    | 8q12.1-q12.2         | CHROMODOMAIN HELICASE DNA-BINDING PROTEIN 7                             | Q9P2D1    | 608892  | Charge Syndrome, Hypogonadotropic hypogonadism 5 with or without anosmia                                                                                                                                  |
| <i>DMXL2</i>   | 15q21.2              | DMX-LIKE 2                                                              | Q8TDJ6    | 612186  | Polyendocrine-polyneuropathy syndrome                                                                                                                                                                     |
| <i>DUSP6</i>   | 12q21.33             | DUAL-SPECIFICITY PHOSPHATASE 6                                          | Q16828    | 602748  | Hypogonadotropic hypogonadism 19 with or without anosmia                                                                                                                                                  |
| <i>FEZF1</i>   | 7q31.32              | FEZ FAMILY ZINC FINGER 1                                                | A0PJY2    | 613301  | Hypogonadotropic hypogonadism 22, with or without anosmia                                                                                                                                                 |
| <i>FGF17</i>   | 8p21.3               | FIBROBLAST GROWTH FACTOR 17                                             | O60258    | 603725  | Hypogonadotropic hypogonadism 20 with or without anosmia                                                                                                                                                  |
| <i>FGF8</i>    | 10q24.32             | FIBROBLAST GROWTH FACTOR 8                                              | P55075    | 600483  | Hypogonadotropic hypogonadism 6 with or without anosmia                                                                                                                                                   |
| <i>FGFR1</i>   | 8p11.23              | FIBROBLAST GROWTH FACTOR RECEPTOR 1                                     | P11362    | 136350  | Encephalocraniocutaneous lipomatosis, Hartsfield syndrome, Hypogonadotropic hypogonadism 2 with or without anosmia, Jackson-Weiss syndrome, Osteoglophonic dysplasia, Pfeiffer syndrome, Trigonocephaly 1 |
| <i>FLRT3</i>   | 20p12.1              | FIBRONECTIN-LIKE DOMAIN-CONTAINING LEUCINE-RICH TRANSMEMBRANE PROTEIN 3 | Q9NZU0    | 604808  | Hypogonadotropic hypogonadism 21 with anosmia                                                                                                                                                             |
| <i>GNRH1</i>   | 8p21.2               | GONADOTROPIN-RELEASING HORMONE 1                                        | O94923    | 152760  | Hypogonadotropic hypogonadism 12 with or without anosmia                                                                                                                                                  |
| <i>GNRHR</i>   | 4q13.2               | GONADOTROPIN-RELEASING HORMONE RECEPTOR                                 | P30968    | 138850  | Hypogonadotropic hypogonadism 7 without anosmia                                                                                                                                                           |
| <i>HS6ST1</i>  | 2q14.3               | HEPARAN SULFATE 6-O-SULFOTRANSFERASE 1                                  | O60243    | 604846  | {Hypogonadotropic hypogonadism 15 with or without anosmia}                                                                                                                                                |
| <i>IL17RD</i>  | 3p14.3               | INTERLEUKIN 17 RECEPTOR D                                               | Q8NFM7    | 606807  | Hypogonadotropic hypogonadism 18 with or without anosmia                                                                                                                                                  |
| <i>ANOS1</i>   | Xp22.31              | KAL1 GENE                                                               | P23352    | 300836  | Hypogonadotropic hypogonadism 1 with or without anosmia (Kallmann syndrome 1)                                                                                                                             |
| <i>KISS1</i>   | 1q32.1               | KISS1 METASTASIS SUPPRESSOR                                             | Q15726    | 603286  | Hypogonadotropic hypogonadism 13 with or without anosmia                                                                                                                                                  |
| <i>KISS1R</i>  | 19p13.3              | KISS1 RECEPTOR                                                          | Q969F8    | 604161  | Precocious puberty, central, 1; Hypogonadotropic hypogonadism 8 with or without anosmia                                                                                                                   |
| <i>KLB</i>     | 4p14                 | KLOTHO, BETA                                                            | Q86Z14    | 611135  | N/A                                                                                                                                                                                                       |
| <i>LEP</i>     | 7q32.1               | LEPTIN                                                                  | P41159    | 164160  | OBESE, MOUSE, HOMOLOG OF                                                                                                                                                                                  |
| <i>LEPR</i>    | 1p31.3               | LEPTIN RECEPTOR                                                         | P48357    | 601007  | Obesity, morbid, due to leptin receptor deficiency                                                                                                                                                        |
| <i>MKRN3</i>   | 15q11.2              | MAKORIN 3                                                               | Q13064    | 603856  | Hypogonadotropic hypogonadism 18 with or without anosmia                                                                                                                                                  |
| <i>NSMF</i>    | 9q34.3               | NMDA RECEPTOR SYNAPTONUCLEAR SIGNALING AND NEURONAL MIGRATION FACTOR    | Q6X4W1    | 608137  | Hypogonadotropic hypogonadism 9 with or without anosmia                                                                                                                                                   |
| <i>OTUD4</i>   | 4q13.2               | OTU DOMAIN-CONTAINING PROTEIN 4                                         | Q01804    | 611744  | Hypogonadotropic hypogonadism 7 without anosmia                                                                                                                                                           |
| <i>PLXNA1</i>  | 3q21.3               | PLEXIN A1                                                               | Q9UIW2    | 601055  | N/A                                                                                                                                                                                                       |

|               |          |                                                        |        |        |                                                                                                                           |
|---------------|----------|--------------------------------------------------------|--------|--------|---------------------------------------------------------------------------------------------------------------------------|
| <i>PNPLA6</i> | 19p13.2  | PATATIN-LIKE PHOSPHOLIPASE DOMAIN-CONTAINING PROTEIN 6 | Q8IY17 | 603197 | Laurence-Moon syndrome, Boucher-Neuhauser Syndrome, Oliver McFarlane Syndrome, Spastic paraplegia 39, autosomal recessive |
| <i>POLR3A</i> | 10q22.3  | POLYMERASE III, RNA, SUBUNIT A                         | O14802 | 614258 | Leukodystrophy, hypomyelinating, 7, with or without oligodontia and/or hypogonadotropic hypogonadism                      |
| <i>POLR3B</i> | 12q23.3  | POLYMERASE III, RNA, SUBUNIT B                         | Q9NW08 | 614366 | Leukodystrophy, hypomyelinating, 8, with or without oligodontia and/or hypogonadotropic hypogonadism                      |
| <i>PROK2</i>  | 3p13     | PROKINETICIN 2                                         | Q9HC23 | 607002 | Hypogonadotropic hypogonadism 4 with or without anosmia                                                                   |
| <i>PROKR2</i> | 20p12.3  | PROKINETICIN RECEPTOR 2                                | Q8NFI6 | 607123 | Hypogonadotropic hypogonadism 3 with or without anosmia                                                                   |
| <i>RNF216</i> | 7p22.1   | RING FINGER PROTEIN 216;                               | Q9NWF9 | 609948 | Cerebellar ataxia and hypogonadotropic hypogonadism                                                                       |
| <i>SEMA3A</i> | 7q21.11  | SEMAPHORIN 3A                                          | Q14563 | 603961 | Hypogonadotropic hypogonadism 16 with or without anosmia                                                                  |
| <i>SEMA3E</i> | 7q21.11  | SEMAPHORIN 3E                                          | O15041 | 608166 | CHARGE syndrome                                                                                                           |
| <i>SOX2</i>   | 3q26.33  | SRY-RELATED HMG-BOX GENE 2                             | P48431 | 184429 | Microphthalmia, syndromic 3, Optic nerve hypoplasia and abnormalities of the central nervous system                       |
| <i>SOX10</i>  | 22q13.1  | SRY-BOX 10                                             | P56693 | 602229 | PCWH syndrome; Waardenburg syndrome, type 2E, with or without neurologic involvement; Waardenburg syndrome, type 4C       |
| <i>SPRY4</i>  | 5q31.3   | SPROUTY RTK SIGNALING ANTAGONIST 4                     | Q9C004 | 607984 | Hypogonadotropic hypogonadism 17 with or without anosmia                                                                  |
| <i>STUB1</i>  | 16p13.3  | STIP1 HOMOLOGOUS AND U BOX-CONTAINING PROTEIN 1        | Q9UNE7 | 607207 | Spinocerebellar ataxia, autosomal recessive 16                                                                            |
| <i>TAC3</i>   | 12q13.3  | TACHYKININ 3                                           | Q9UHF0 | 162330 | Hypogonadotropic hypogonadism 10 with or without anosmia                                                                  |
| <i>TACR3</i>  | 4q24     | TACHYKININ RECEPTOR 3                                  | P29371 | 162332 | Hypogonadotropic hypogonadism 11 with or without anosmia                                                                  |
| <i>TUBB3</i>  | 16q24.3  | TUBULIN BETA 3 CLASS III                               | Q13509 | 602661 | Cortical dysplasia, complex, with other brain malformations 1, Fibrosis of extraocular muscles, congenital, 3A            |
| <i>WDR11</i>  | 10q26.12 | WD REPEAT-CONTAINING PROTEIN 11                        | Q9BZH6 | 606417 | Hypogonadotropic hypogonadism 14 with or without anosmia                                                                  |
